# Supplementary material for: Impact of transposable elements on genome structure and evolution in bread wheat
Source: PubMed Central journal article supplement (PMC6097303; doi:10.1186/s13059-018-1479-0), 2018-08-17
Supplement: 13059_2018_1479_MOESM1_ESM.pdf [file 13059_2018_1479_MOESM1_ESM.pdf]

Supplementary Materials for

**Impact of transposable elements on genome structure and evolution in  
bread wheat**

Thomas Wicker<sup>1†</sup>, Heidrun Gundlach<sup>2†</sup>, Manuel Spannagl<sup>12</sup>, Cristobal Uauy<sup>3</sup>, Philippa Borrill<sup>3</sup>, Ricardo H. Ramírez-González<sup>3</sup>, Romain De Oliveira<sup>4</sup>, International Wheat Genome Sequencing Consortium, Klaus F. X. Mayer<sup>2</sup>, Etienne Paux<sup>4</sup>, Frédéric Choulet<sup>4\*</sup>

correspondence to: frederic.choulet@inra.fr

This PDF file includes:

**Tables S1 to S2**

**Figures S1 to S20**

**Table S1: Metrics of the wheat full length LTR-retrotransposon (fLTR-RT) complement.** 'U' denotes the unassigned assembly portion

|     |     | number  | RLC<br>/<br>number RLG<br>per Mb ratio | Mb      | median<br>length<br>(bps) | LTR %<br>of<br>length* | median<br>age<br>(Myrs) | median<br>20-mer<br>frequency |
|-----|-----|---------|----------------------------------------|---------|---------------------------|------------------------|-------------------------|-------------------------------|
| ABD | all | 112,744 | 7.9                                    | 1,080.6 | 9,584                     |                        | 1.18                    | 10,791                        |
| ABD | RLC | 58,690  | 4.1                                    | 522.9   | 8,536                     | 15.0                   | 0.95                    | 16,720                        |
| ABD | RLG | 28,489  | 2.0                                    | 325.1   | 10,436                    | 7.1                    | 1.30                    | 3,055                         |
| ABD | RLX | 25,565  | 1.8                                    | 232.6   | 8,091                     | 9.2                    | 1.66                    | 5,102                         |
| A   | all | 40,328  | 8.3                                    | 388.3   | 9,629                     |                        | 1.23                    | 10,750                        |
| A   | RLC | 20,636  | 4.2                                    | 183.6   | 8,552                     | 15.3                   | 0.98                    | 16,614                        |
| A   | RLG | 10,835  | 2.2                                    | 124.0   | 10,473                    | 7.2                    | 1.34                    | 3,343                         |
| A   | RLX | 8,857   | 1.8                                    | 80.7    | 8,091                     | 8.9                    | 1.73                    | 5,273                         |
| B   | all | 39,859  | 7.8                                    | 384.4   | 9,645                     |                        | 1.27                    | 9,640                         |
| B   | RLC | 20,367  | 4.0                                    | 183.3   | 8,561                     | 14.7                   | 1.04                    | 15,243                        |
| B   | RLG | 10,328  | 2.0                                    | 118.9   | 10,594                    | 6.4                    | 1.36                    | 2,750                         |
| B   | RLX | 9,164   | 1.8                                    | 82.3    | 8,079                     | 9.2                    | 1.72                    | 5,174                         |
| D   | all | 31,055  | 8.0                                    | 291.0   | 9,369                     |                        | 1.02                    | 12,379                        |
| D   | RLC | 17,021  | 4.4                                    | 149.2   | 8,447                     | 14.9                   | 0.83                    | 18,928                        |
| D   | RLG | 7,044   | 1.8                                    | 78.8    | 10,270                    | 8.6                    | 1.14                    | 2,913                         |
| D   | RLX | 6,990   | 1.8                                    | 62.9    | 8,065                     | 9.9                    | 1.48                    | 4,515                         |
| U   | all | 1,502   | 3.5                                    | 16.9    | 11,241                    |                        | 0.94                    | 9,624                         |
| U   | RLC | 666     | 1.5                                    | 6.8     | 8,584                     | 12.2                   | 0.90                    | 14,901                        |
| U   | RLG | 282     | 0.7                                    | 3.5     | 11,074                    | 6.7                    | 0.84                    | 4,570                         |
| U   | RLX | 554     | 1.3                                    | 6.7     | 10,267                    | 6.2                    | 1.08                    | 6,613                         |

\* length percent of one terminal repeat in relation to the element length

**Table S2: Coordinates of the chromosome compartments defined based on structural and functional features in [24].** R1 and R3: distal regions of short and long chromosome arms, respectively. R2a and R2b: interstitial regions on short and long chromosome arms, respectively. C: centromeric/pericentromeric regions. Positions are given in Mb.

|       | Length (Mb) | R1/R2a<br>boundary | R2a/C<br>boundary | C/R2b<br>boundary | R2b/R3<br>boundary | Centromere |
|-------|-------------|--------------------|-------------------|-------------------|--------------------|------------|
| chr1A | 594         | 59                 | 151               | 231               | 480                | 213.5      |
| chr1B | 689         | 62                 | 172               | 277               | 534                | 236.7      |
| chr1D | 495         | 29                 | 98                | 171               | 385                | 172.5      |
| chr2A | 780         | 42                 | 206               | 379               | 662                | 340.0      |
| chr2B | 801         | 59                 | 248               | 433               | 660                | 349.4      |
| chr2D | 651         | 37                 | 192               | 338               | 520                | 268.0      |
| chr3A | 750         | 62                 | 249               | 414               | 670                | 319.0      |
| chr3B | 830         | 66                 | 257               | 407               | 728                | 346.8      |
| chr3D | 615         | 49                 | 167               | 287               | 543                | 242.7      |
| chr4A | 744         | 41                 | 180               | 414               | 594                | 265.5      |
| chr4B | 673         | 42                 | 186               | 360               | 537                | 319.3      |
| chr4D | 509         | 10                 | 135               | 288               | 432                | 185.8      |
| chr5A | 709         | 39                 | 140               | 260               | 427                | 253.8      |
| chr5B | 713         | 52                 | 140               | 221               | 430                | 198.9      |
| chr5D | 565         | 46                 | 128               | 207               | 345                | 188.8      |
| chr6A | 617         | 46                 | 216               | 409               | 556                | 285.3      |
| chr6B | 720         | 56                 | 221               | 429               | 651                | 325.2      |
| chr6D | 473         | 44                 | 164               | 280               | 410                | 214.1      |
| chr7A | 736         | 89                 | 239               | 416               | 659                | 359.4      |
| chr7B | 750         | 12                 | 146               | 418               | 660                | 296.4      |
| chr7D | 638         | 84                 | 200               | 373               | 552                | 339.4      |

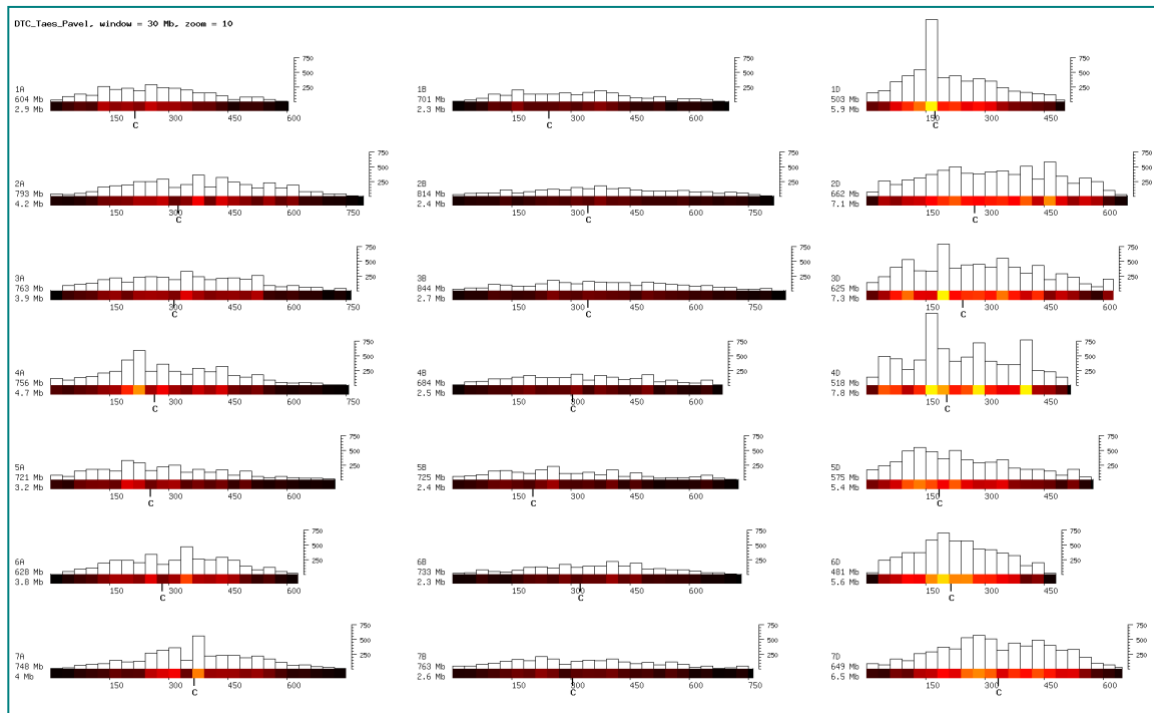

**Figure S1: Distribution of the DTC\_famc10.3 (Pavel) subfamily along wheat chromosomes.** Pavel is more abundant in the D genome than in the A and B genomes, suggesting it underwent a burst of activity after the D genome diverged from the other two. The TE distribution is shown in 30 Mb windows along chromosomes. TE abundance per 30 Mb-window is shown as heat map and as a bar plot. The x-axis indicates the physical position in Mb, while the y-axis indicates the number of kb the TE family contributes to each 30 Mb. The label to the left of each chromosome indicates the chromosome name, chromosome size in Mb, and total contribution of the TE family to the chromosome sequence (in Mb).

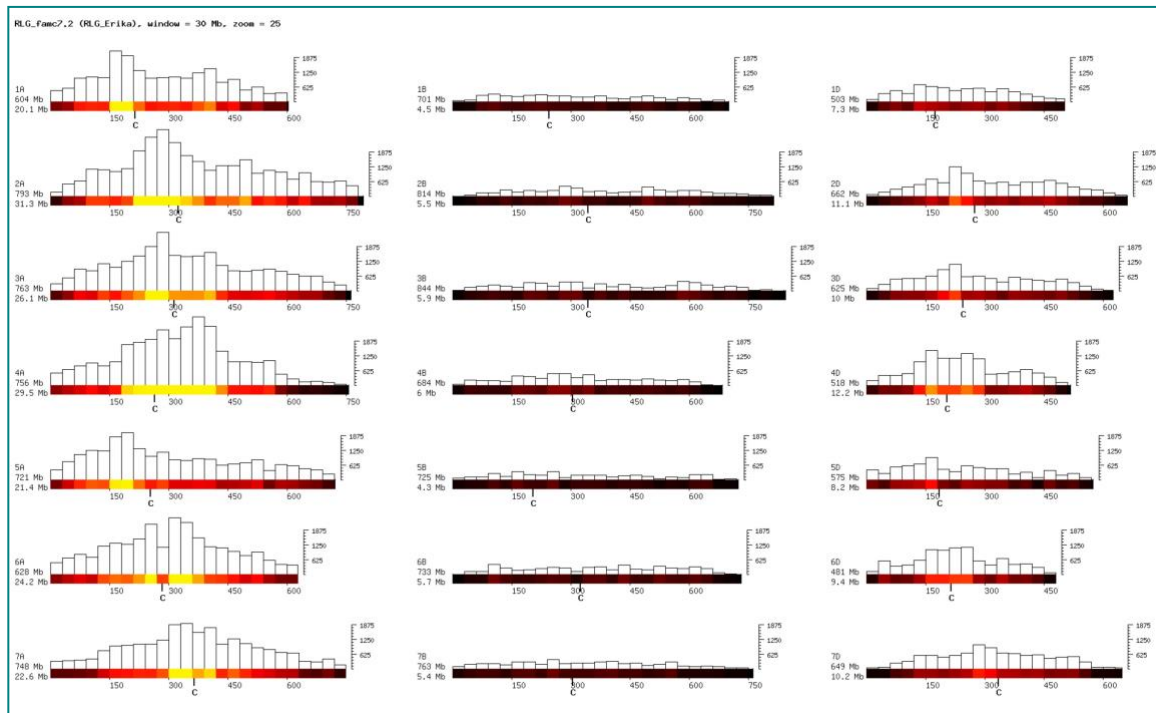

**Figure S2: Distribution of the RLG\_famc7.2 (Erika) subfamily along wheat chromosomes.** Erika is most abundant in the A genome and somewhat less in the D genome, and it is the only subfamily that is depleted in the D genome. TE abundance per 30 Mb window is shown as heat map and as a bar plot. The x-axis indicates the physical position in Mb, while the y-axis indicates the number of kb the TE family contributes to each 30 Mb. The label to the left of each chromosome indicates the chromosome name, chromosome size in Mb, and total contribution of the TE family to the chromosome sequence (in Mb).

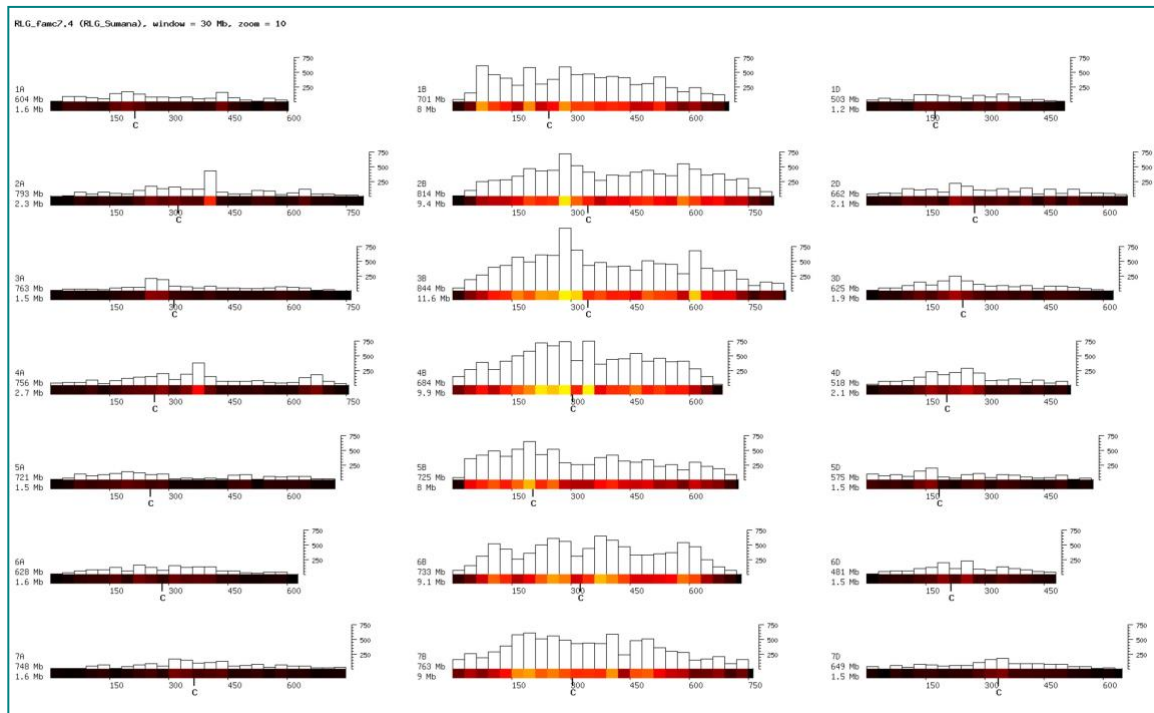

**Figure S3: Distribution of the RLG\_famc7.4 (Sumana) subfamily along wheat chromosomes.** Sumana is more abundant in the B genome. TE abundance per 30 Mb window is shown as heat map and as a bar plot. The x-axis indicates the physical position in Mb, while the y-axis indicates the number of kb the TE family contributes to each 30 Mb. The label to the left of each chromosome indicates the chromosome name, chromosome size in Mb, and total contribution of the TE family to the chromosome sequence (in Mb).

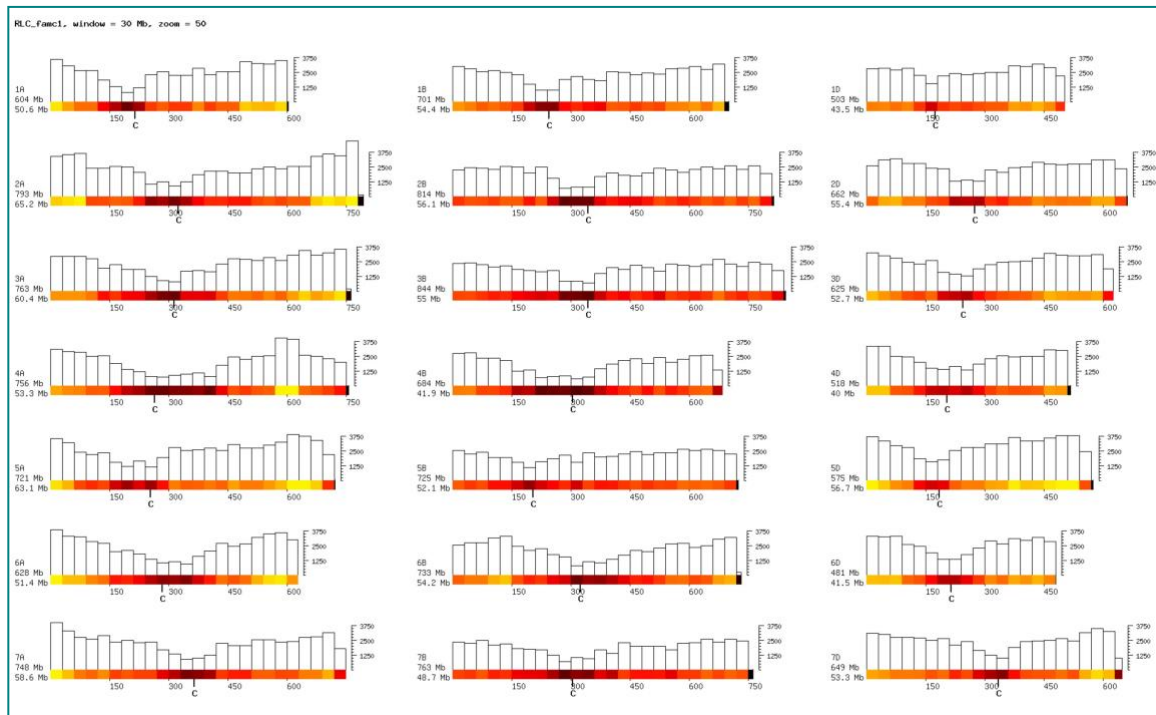

**Figure S4: Distribution of the RLC\_famc1 (Angela) family along wheat chromosomes.** Angela is generally enriched toward centromeres and depleted in central regions of chromosomes. The TE distribution is shown in 30 Mb windows along chromosomes. TE abundance per 30 Mb window is shown as heat map and as a bar plot. The x-axis indicates the physical position in Mb, while the y-axis indicates the number of kb the TE family contributes to each 30 Mb. The label to the left of each chromosome indicates the chromosome name, chromosome size in Mb, and total contribution of the TE family to the chromosome sequence (in Mb).

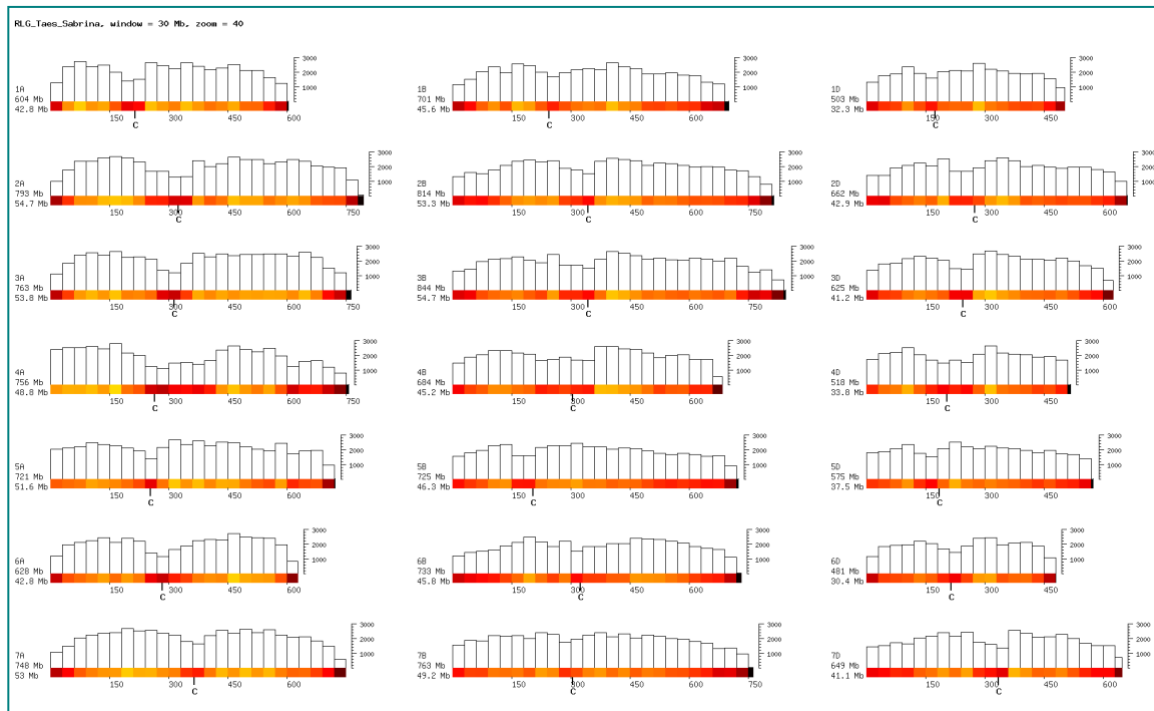

**Figure S5: Distribution of the RLG\_famc2 (Sabrina) family along wheat chromosomes.** Sabrina is enriched in the central parts of chromosome arms and depleted in distal and proximal regions. The TE distribution is shown in 30 Mb windows along chromosomes. TE abundance per 30 Mb window is shown as heat map and as a bar plot. The x-axis indicates the physical position in Mb, while the y-axis indicates the number of kb the TE family contributes to each 30 Mb. The label to the left of each chromosome indicates the chromosome name, chromosome size in Mb, and total contribution of the TE family to the chromosome sequence (in Mb).



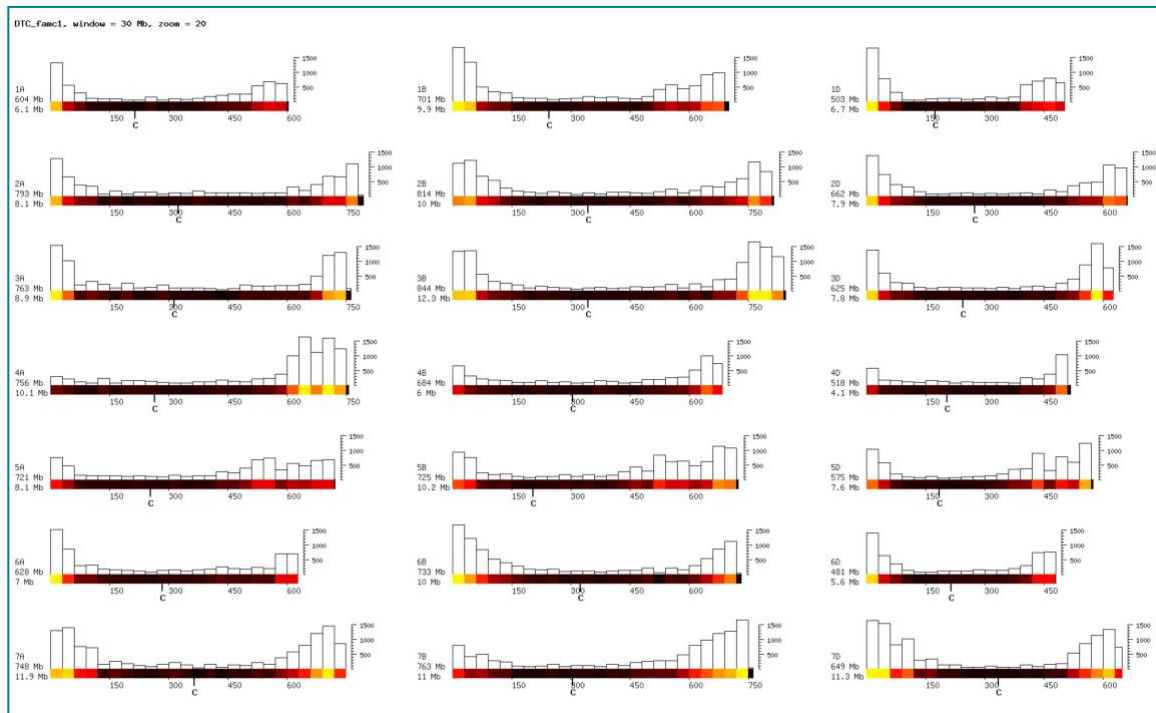

**Figure S6: Distribution of the DTC\_famc1 (Caspar) family along wheat chromosomes.** Caspar is enriched in distal regions and practically absent from proximal regions. The TE distribution is shown in 30 Mb windows along chromosomes. TE abundance per 30 Mb window is shown as heat map and as a bar plot. The x-axis indicates the physical position in Mb, while the y-axis indicates the number of kb the TE family contributes to each 30 Mb. The label to the left of each chromosome indicates the chromosome name, chromosome size in Mb, and total contribution of the TE family to the chromosome sequence (in Mb).

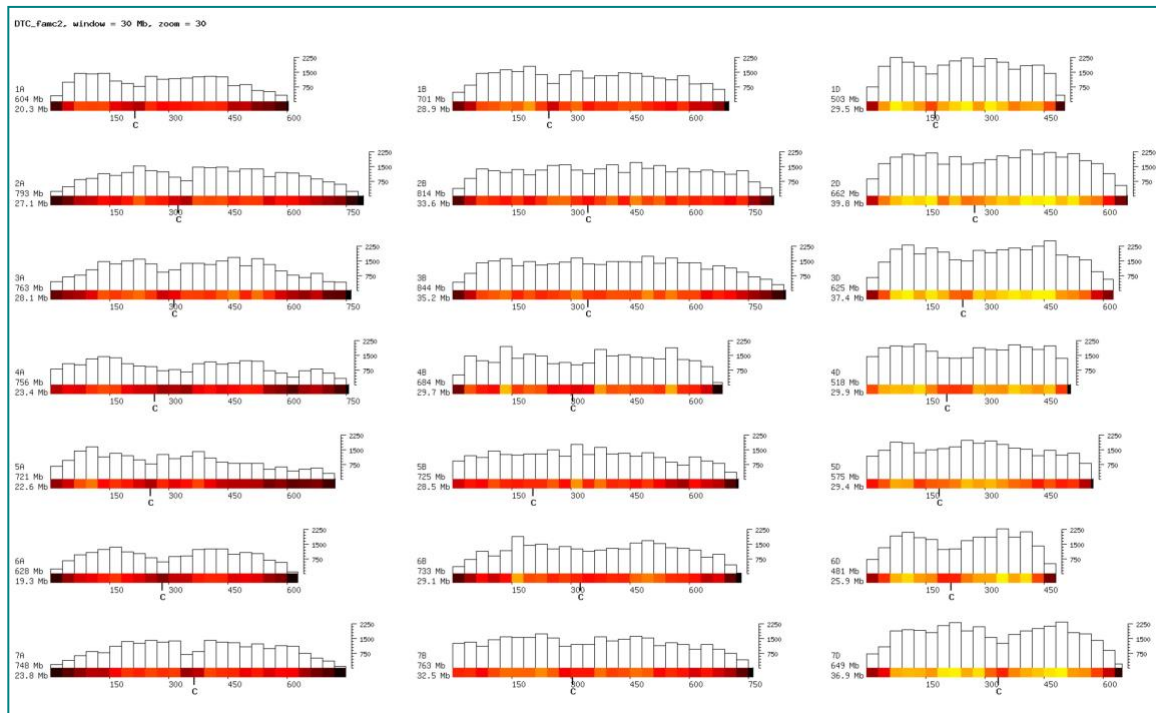

**Figure S7: Distribution of the DTC\_famc2 (Jorge) family along wheat chromosomes.** Jorge is enriched in the central parts of chromosome arms and depleted in telomeric and centromeric regions. The TE distribution is shown in 30 Mb windows along chromosomes. TE abundance per 30 Mb window is shown as heat map and as a bar plot. The x-axis indicates the physical position in Mb, while the y-axis indicates the number of kb the TE family contributes to each 30 Mb. The label to the left of each chromosome indicates the chromosome name, chromosome size in Mb, and total contribution of the TE family to the chromosome sequence (in Mb).

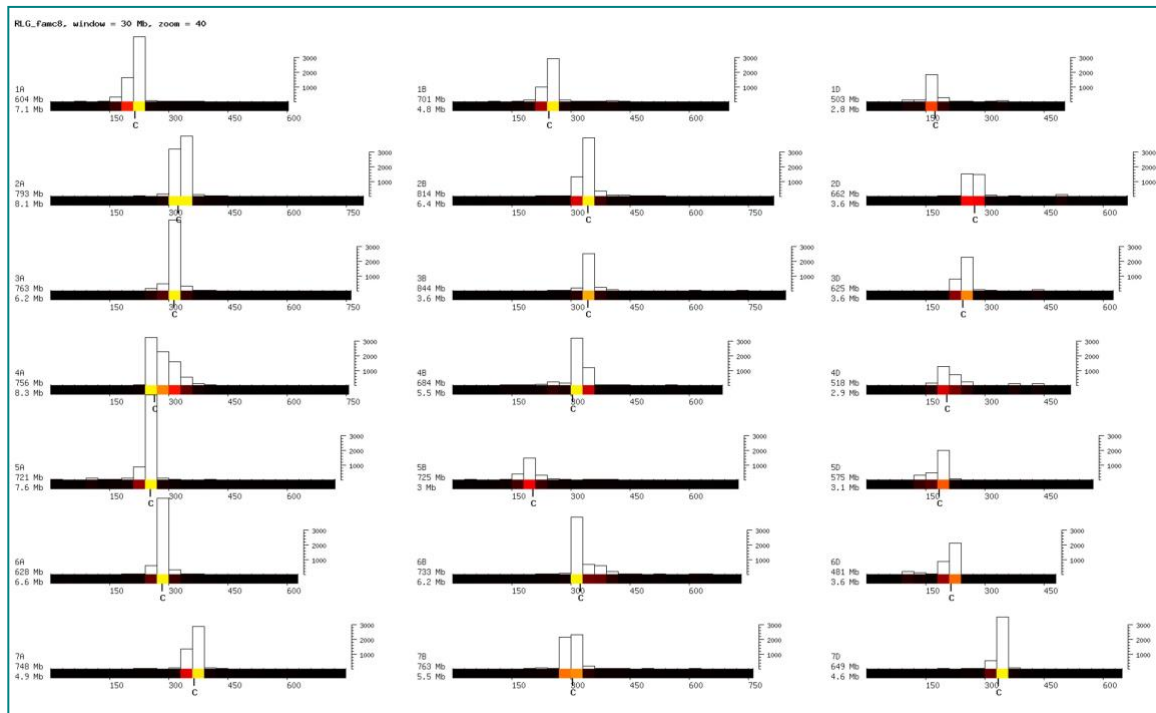

**Figure S8: Distribution of RLG\_famc8 (Cereba) retrotransposons along wheat chromosomes.** Cereba is highly enriched in centromeric regions. The TE distribution is shown in 30 Mb windows along chromosomes. TE abundance per 30 Mb window is shown as heat map and as a bar plot. The x-axis indicates the physical position in Mb, while the y-axis indicates the number of kb the TE family contributes to each 30 Mb. The label to the left of each chromosome indicates the chromosome name, chromosome size in Mb, and total contribution of the TE family to the chromosome sequence (in Mb).

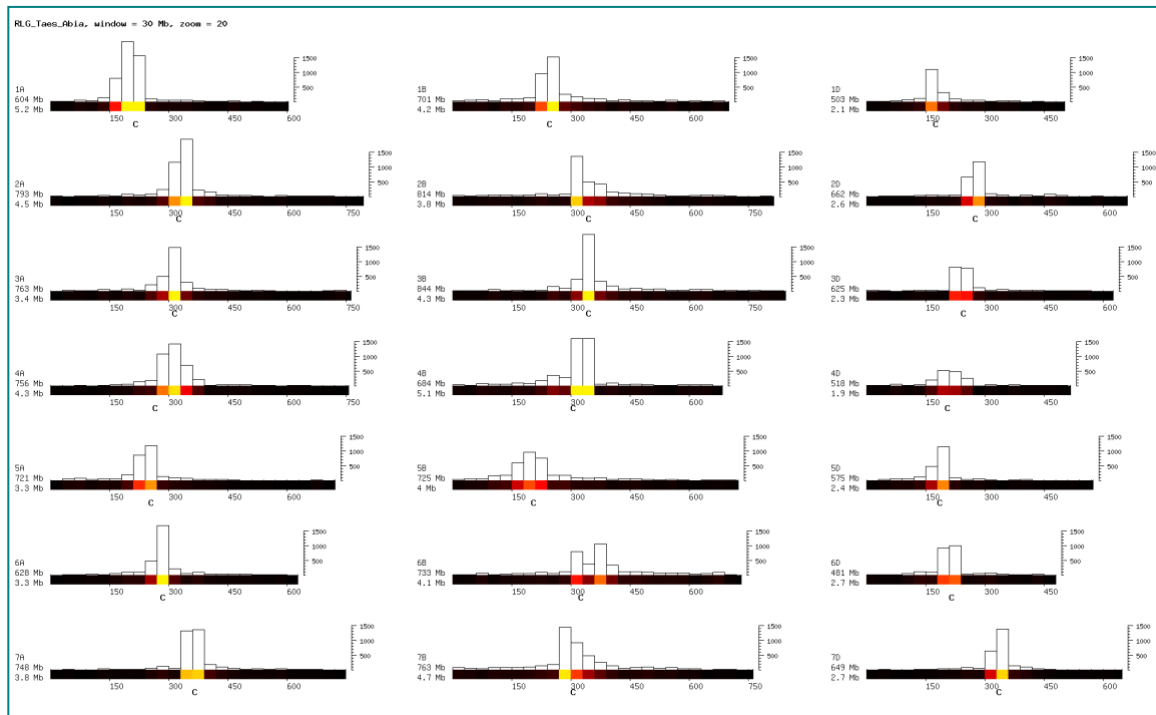

**Figure S9: Distribution of RLG\_famc39 (Abia) retrotransposons along wheat chromosomes.** Abia is highly enriched in centromeric regions. The TE distribution is shown in 30 Mb windows along chromosomes. TE abundance per 30 Mb window is shown as heatmap and as a bar plot. The x-axis indicates the physical position in Mb, while the y-axis indicates the number of kb the TE family contributes to each 30 Mb. The label to the left of each chromosome indicates the chromosome name, chromosome size in Mb, and total contribution of the TE family to the chromosome sequence (in Mb).

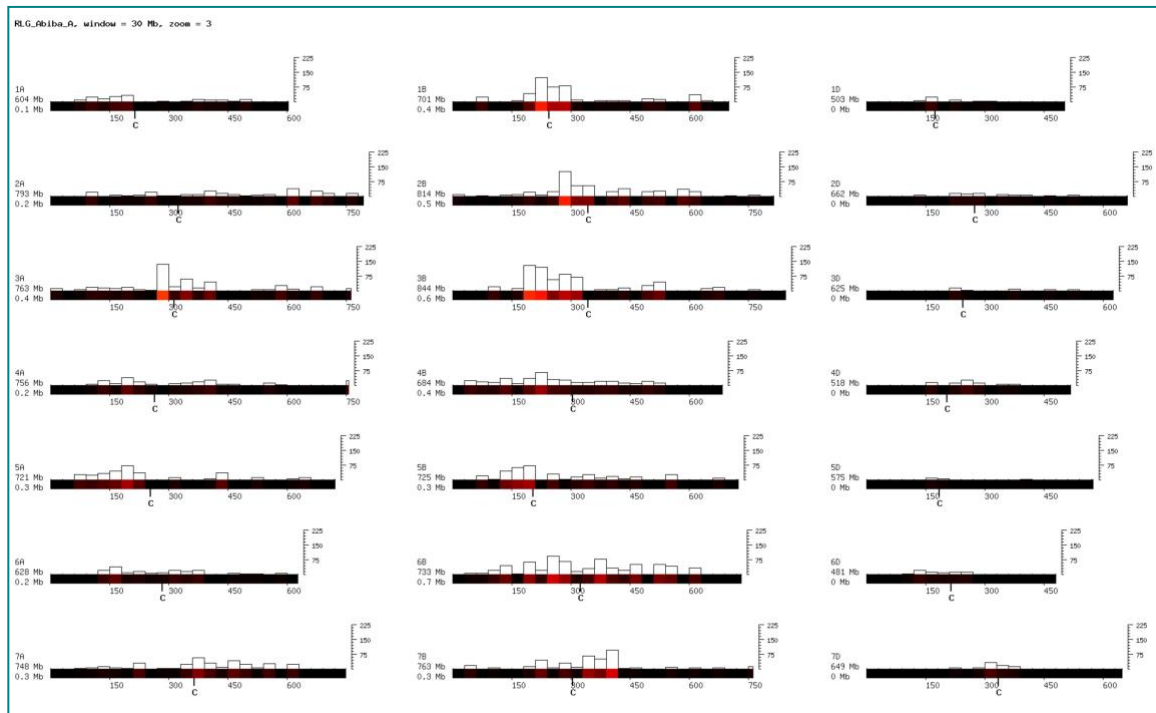

**Figure S10: Distribution of RLG\_famc40.1 (Abiba\_A) subfamily along wheat chromosomes.** The TE distribution is shown in 30 Mb windows along chromosomes. TE abundance per 30 Mb window is shown as heat map and as a bar plot. The x-axis indicates the physical position in Mb, while the y-axis indicates the number of kb the TE family contributes to each 30 Mb. The label to the left of each chromosome indicates the chromosome name, chromosome size in Mb, and total contribution of the TE family to the chromosome sequence (in Mb).

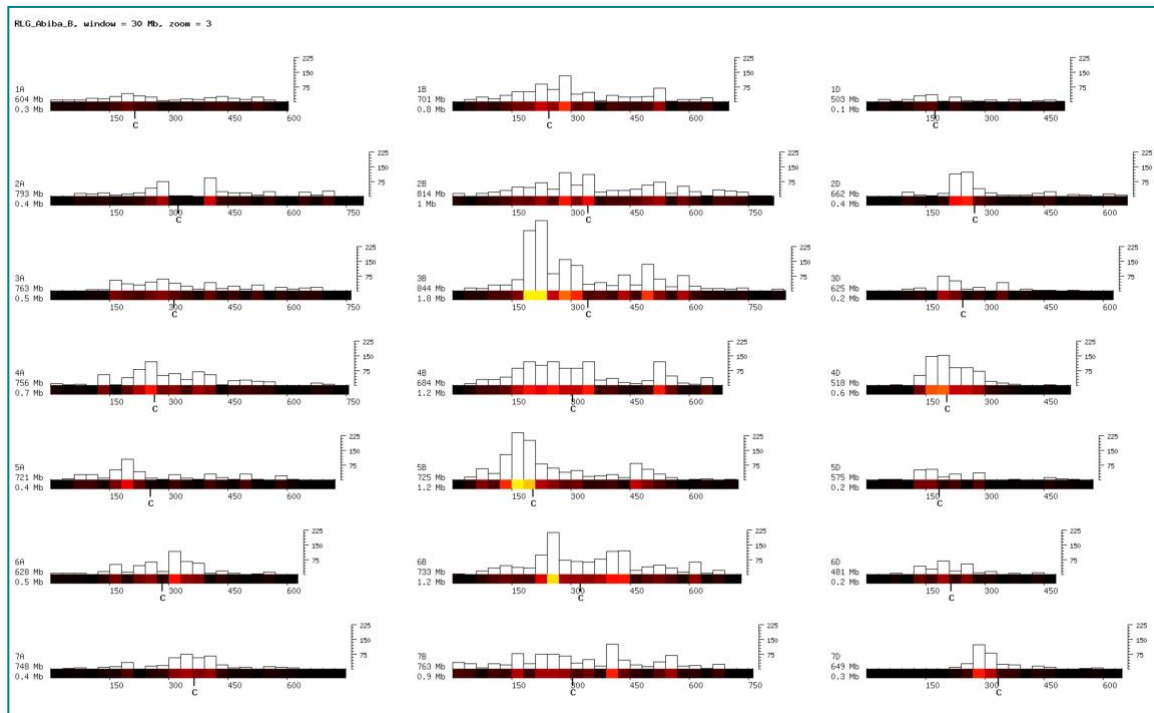

**Figure S11: Distribution of RLG\_famc40.2 (Abiba\_B) subfamily along wheat chromosomes.** The TE distribution is shown in 30 Mb windows along chromosomes. TE abundance per 30 Mb window is shown as heat map and as a bar plot. The x-axis indicates the physical position in Mb, while the y-axis indicates the number of kb the TE family contributes to each 30 Mb. The label to the left of each chromosome indicates the chromosome name, chromosome size in Mb, and total contribution of the TE family to the chromosome sequence (in Mb).

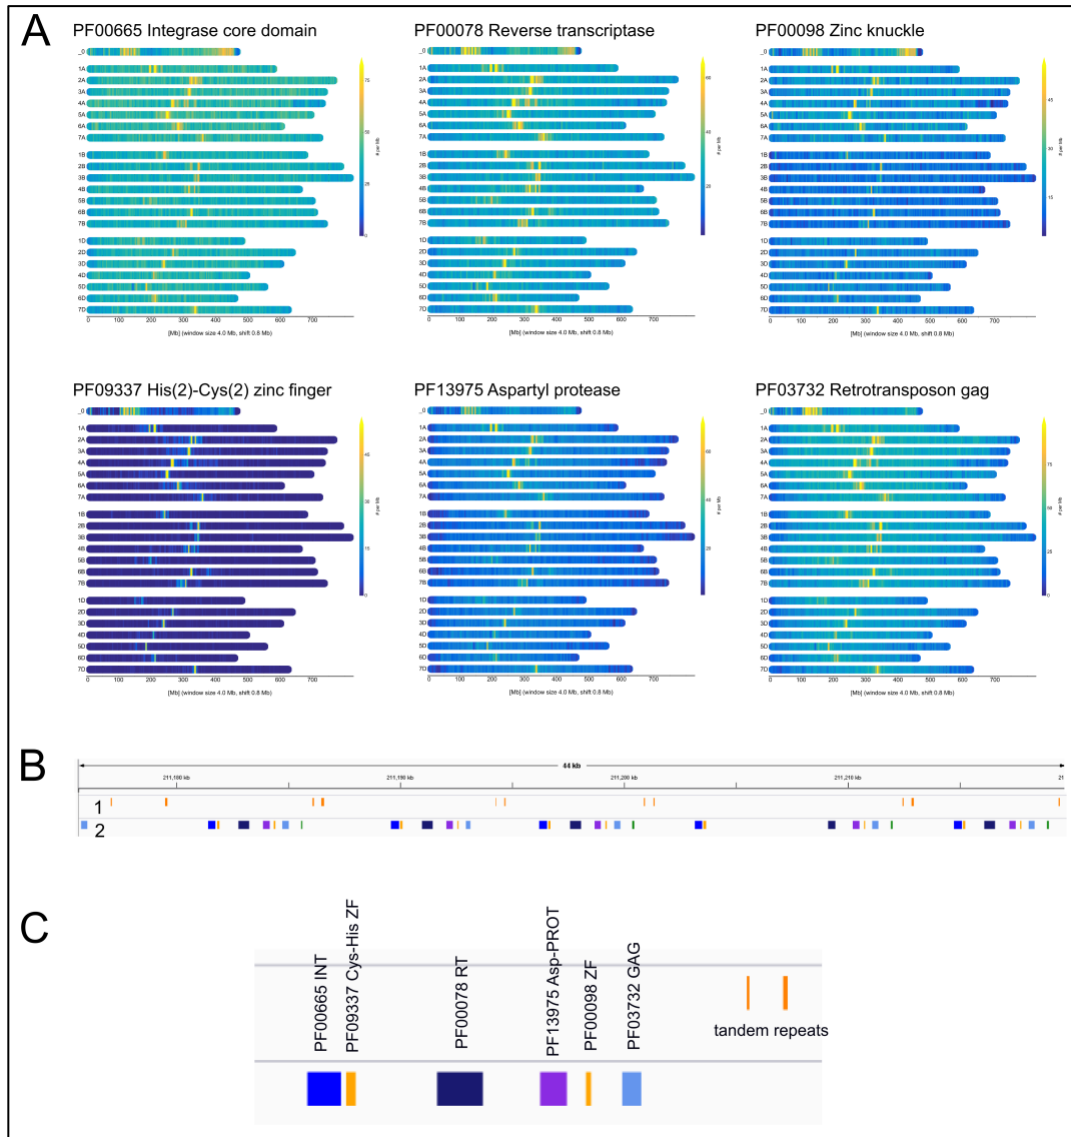

**Figure S12: Location and structure of wheat centromeres.** **A.** Transposon-related Pfam domains as centromere indicators. We identified six transposon-related Pfam domains that are strongly enriched in the centromeres. The PF09337 zinc-finger occurs even almost exclusively in the centromeres. Large amounts of them were found in the scaffolds unassigned to pseudomolecules (labeled "\_0" at the top) showing that such repeated arrays were difficult to assemble. This may largely explain the differences observed between chromosomes in their centromere dimensions (strength or multiple hotspots) **B.** Zoomed in view on a 44 kb centromeric region of chromosome 4A showing tandemly repeated clusters of Cereba-associated Pfam domains (track 2). **C.** Zoomed in view on a centromere repeat unit comprising 6 domains and 2 short simple sequence repeats.

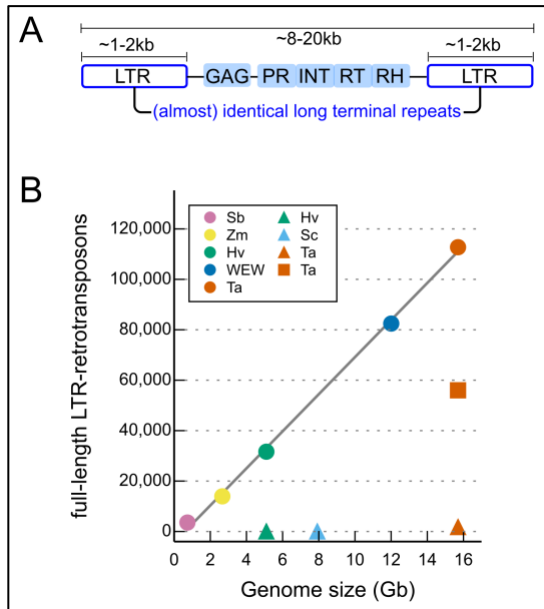

**Figure S13: Full length LTR-retrotransposons and assembly quality.** **A.** Schematic structure of a full length LTR-retrotransposon (fLTR-RT). **B.** Number of retrieved fLTR-RTs in different genome assemblies. The (almost) identical 1-2 kb long terminal repeats of fLTR-RTs were often not correctly reconstructed in previous contig assemblies (triangles). We observed a linear correlation between fLTR-RTs and genome size in high quality assemblies. The number of retrievable fLTR-RTs can thus serve as a metric to estimate the quality of the assembly of the repeated part of the genomes. Circles denote more complete assemblies, triangles lower quality contig assemblies. Sb: *Sorghum bicolor* [9]; Zm: *Zea mays* [10]; Hv: *Hordeum vulgare*, triangle [6], circle [23]; Sc: *Secale cereale* [47]; WEW: wild emmer wheat [48]; Ta: bread wheat, triangle IWGSC-2014 [30], square TGAC\_v1 [29] (missing mainly young Copia elements), circle IWGSC RefSeq\_v1.0 from this study.



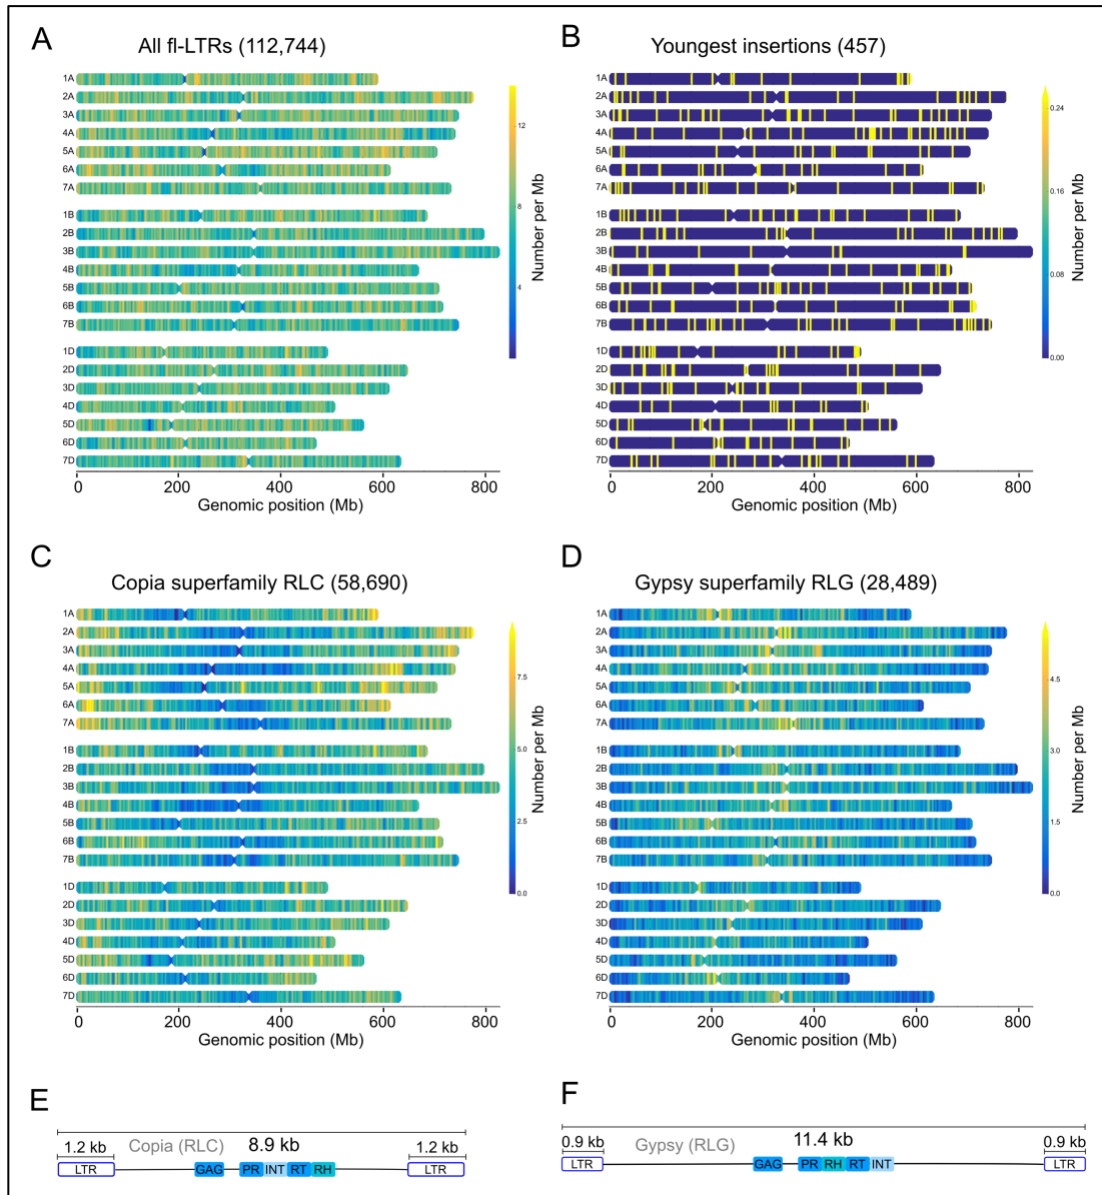

**Figure S14: Chromosomal distribution of full length LTR-retrotransposons.** **A.** All 112,744 insertion sites, **B.** Most recent 457 insertion sites from elements aged 0, RLCs . **C.** and **D.** Contrasting locations of the Copia (RLC) and Gypsy (RLG) superfamilies. **E.** and **F.** Copia and Gypsy element dimensions. The values correspond to median sizes over all RLC and RLG copies. Copia elements are shorter but have longer terminal repeats. The two terminal repeats cover around 30% of the Copia and only 14% of the Gypsy elements.

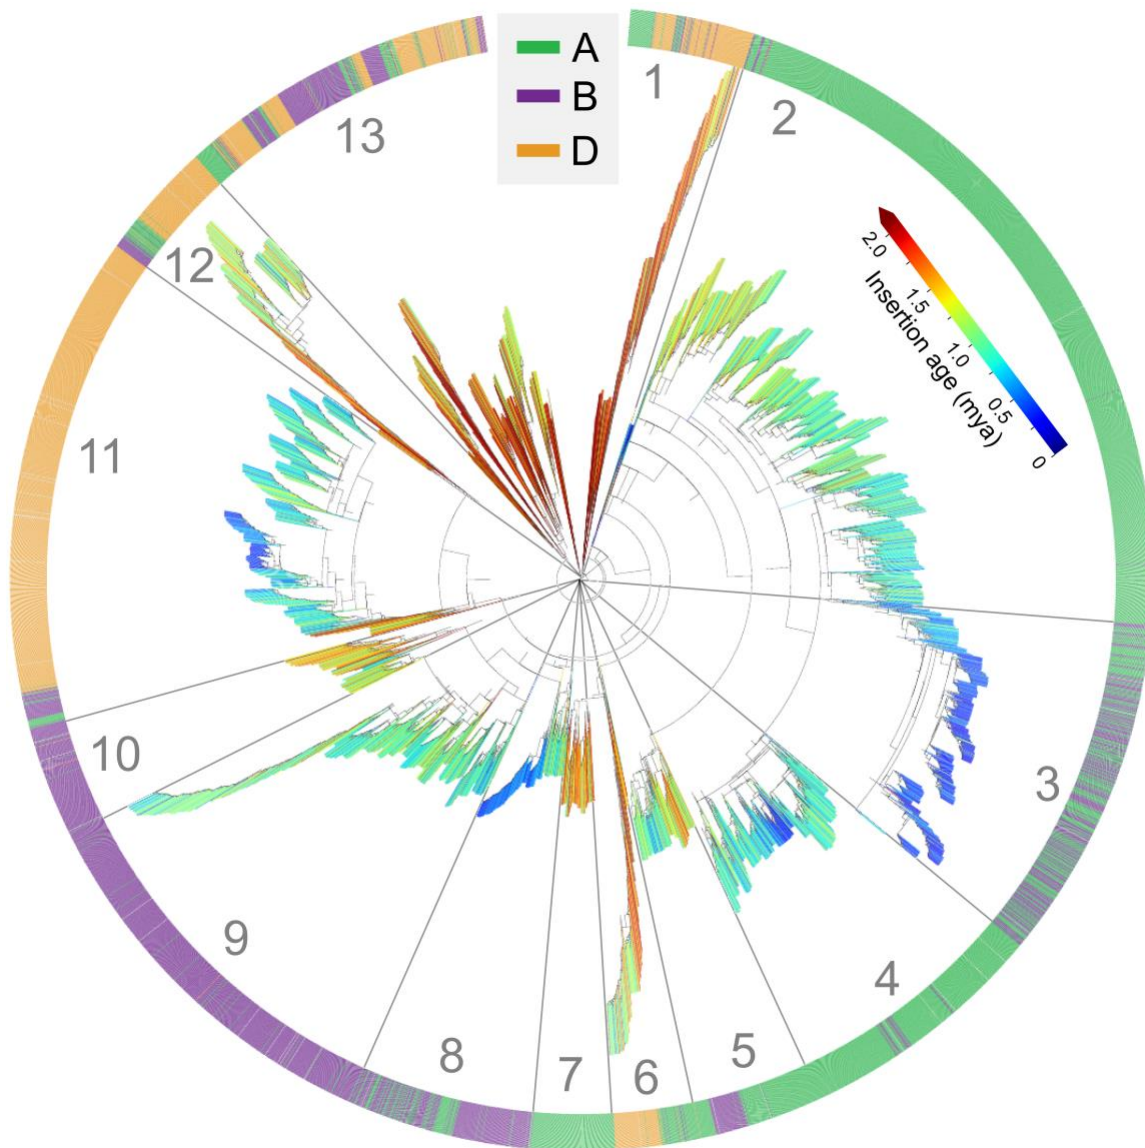

**Figure S15: Phylogenetic tree for the largest fLTR-RT 90/90 cluster with 6,639 Copia members.** The tree leaves are color coded by insertion age, the outer ring represents the subgenome localization of each element. Section lines and numbers were added manually to mark distinct constellations. Summary for Fig S15, S16 and S17: the recent proliferation in the AB tetraploid led to small scaled AB interweaving patterns in the outer ring (green-magenta) and always coincides with young age (blue color). The founder elements for these lineages came from either the A (e.g. Fig. S15-3, S16-9) or B (e.g. Fig. S16-2/4, S17-4) diploid ancestor. The large A (e.g. Fig. S15-2, S16-8) and B (e.g. Fig. S15-9, S16-5) sections contain mostly medium aged elements (1-1.5 Myrs) or, in the case of D, (e.g. Fig. S16-11) also younger lineages relating to the more recent Copia amplifications in the diploid. The oldest (~2 Myrs) and smallest lineages are located near the tree root and reveal several constellations where old elements seem to

have been transferred from either an A lineage (e.g. Fig. S15-1/6, S16-1, S17-3) or an B lineage (Fig. S15-11) to the D ancestor and gave rise to subsequent amplification rounds in D (see Fig 5, marked by an asterisk). We did not detect any transfer originating from D. Moreover, the D lineages were absent from primary branches at the root and all have an A or B precursor, consistent with the scenario of an homoploid hybridization between A and B at the origin of the D subgenome [34].

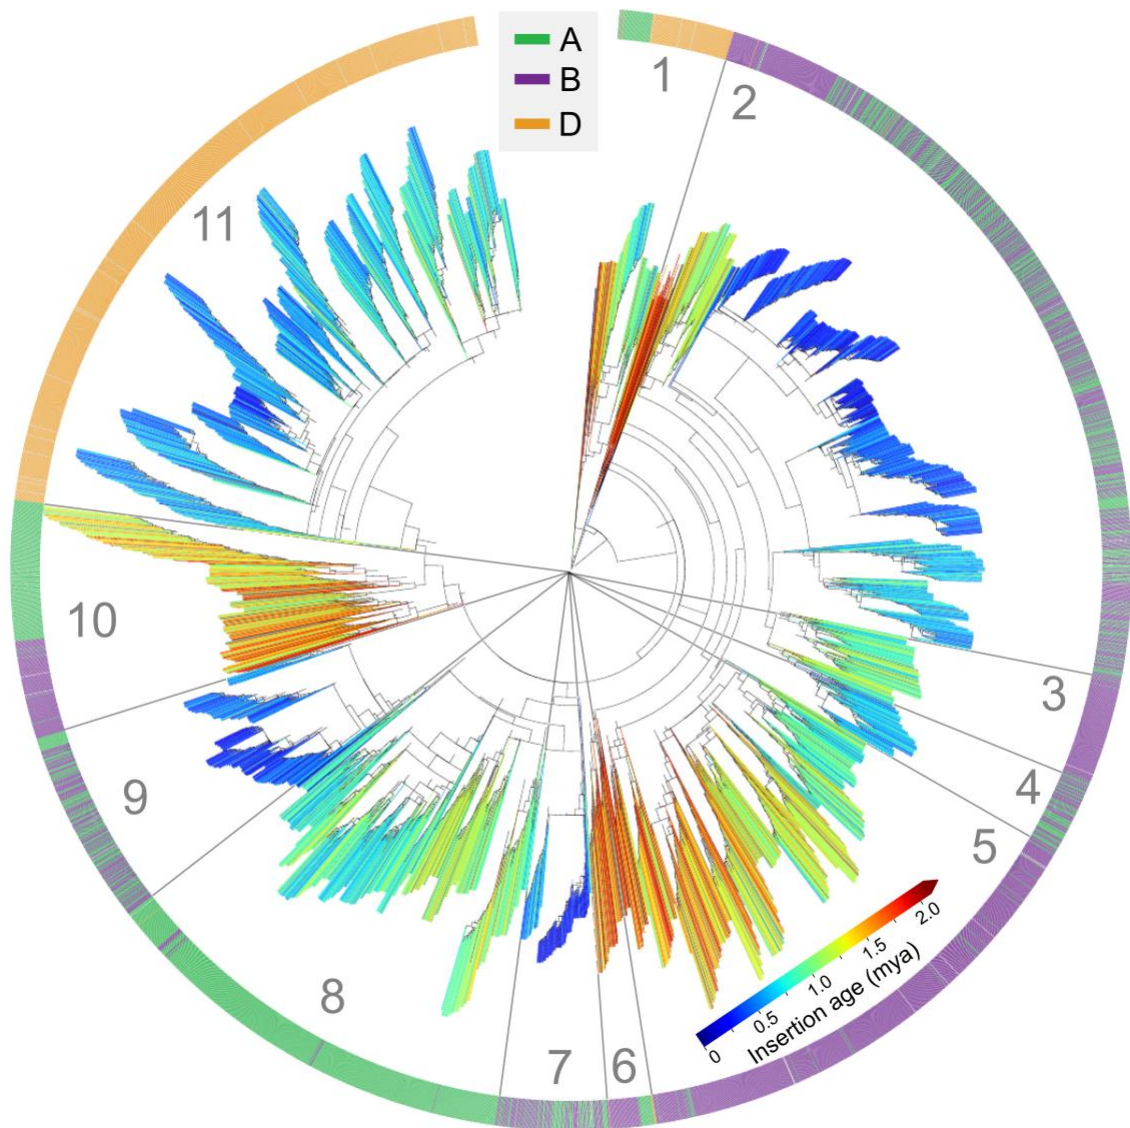

**Figure S16: Phylogenetic tree for the second largest fLTR-RT 90/90 cluster with 5,387 Copia members.** The tree leaves are color coded by insertion age, the outer ring represents the subgenome localization of each element. Section lines and numbers were added manually to mark distinct constellations.

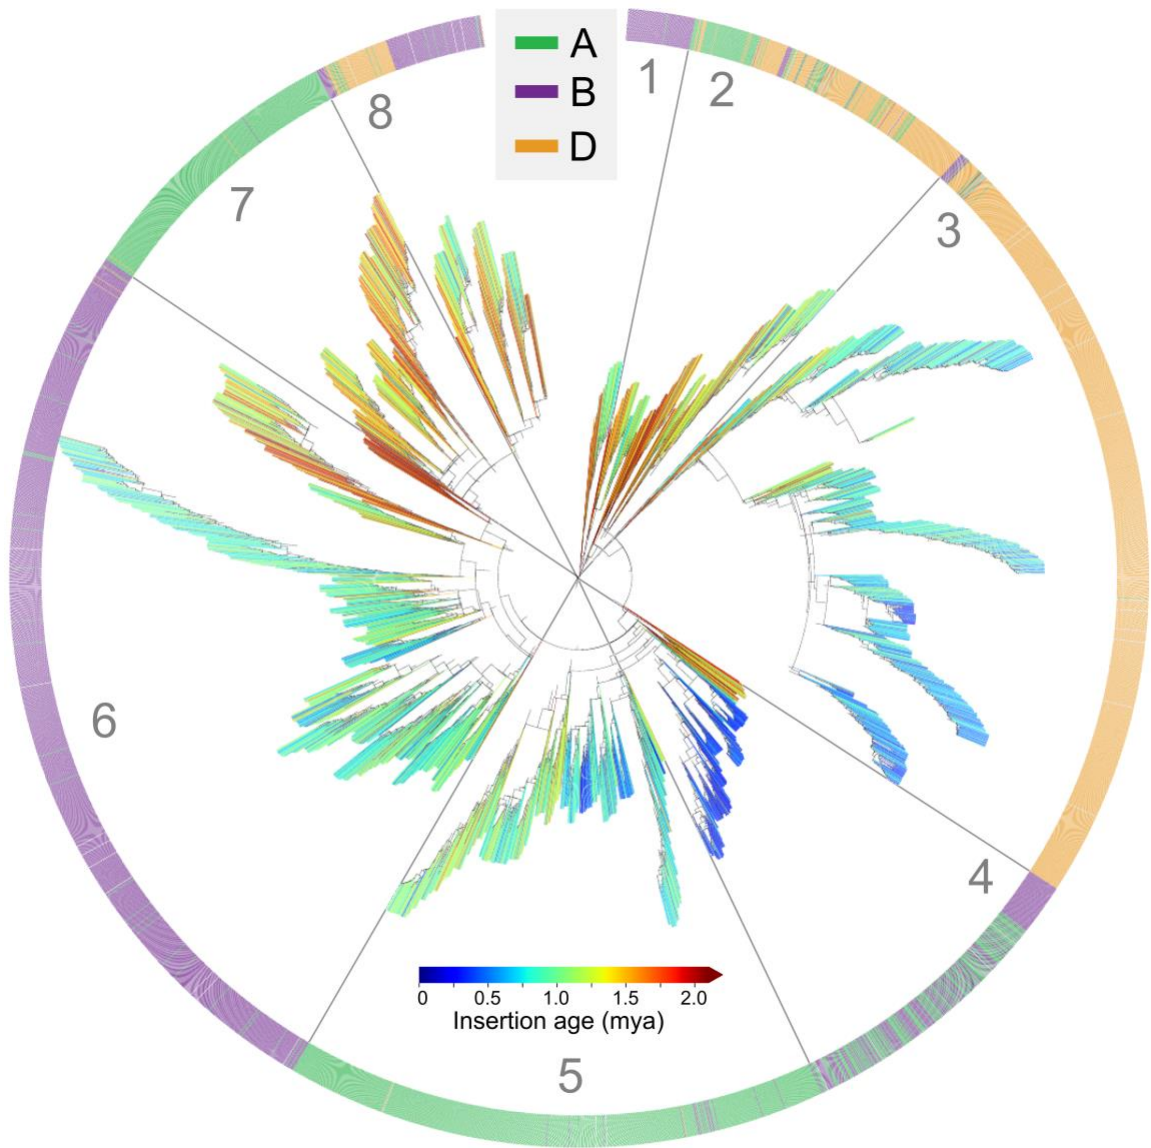

**Figure S17: Phylogenetic tree for the third largest fLTR-RT 90/90 cluster with 4,564 Copia members.** The tree leaves are color coded by insertion age, the outer ring represents the subgenome localization of each element. Section lines and numbers were added manually to mark distinct constellations.

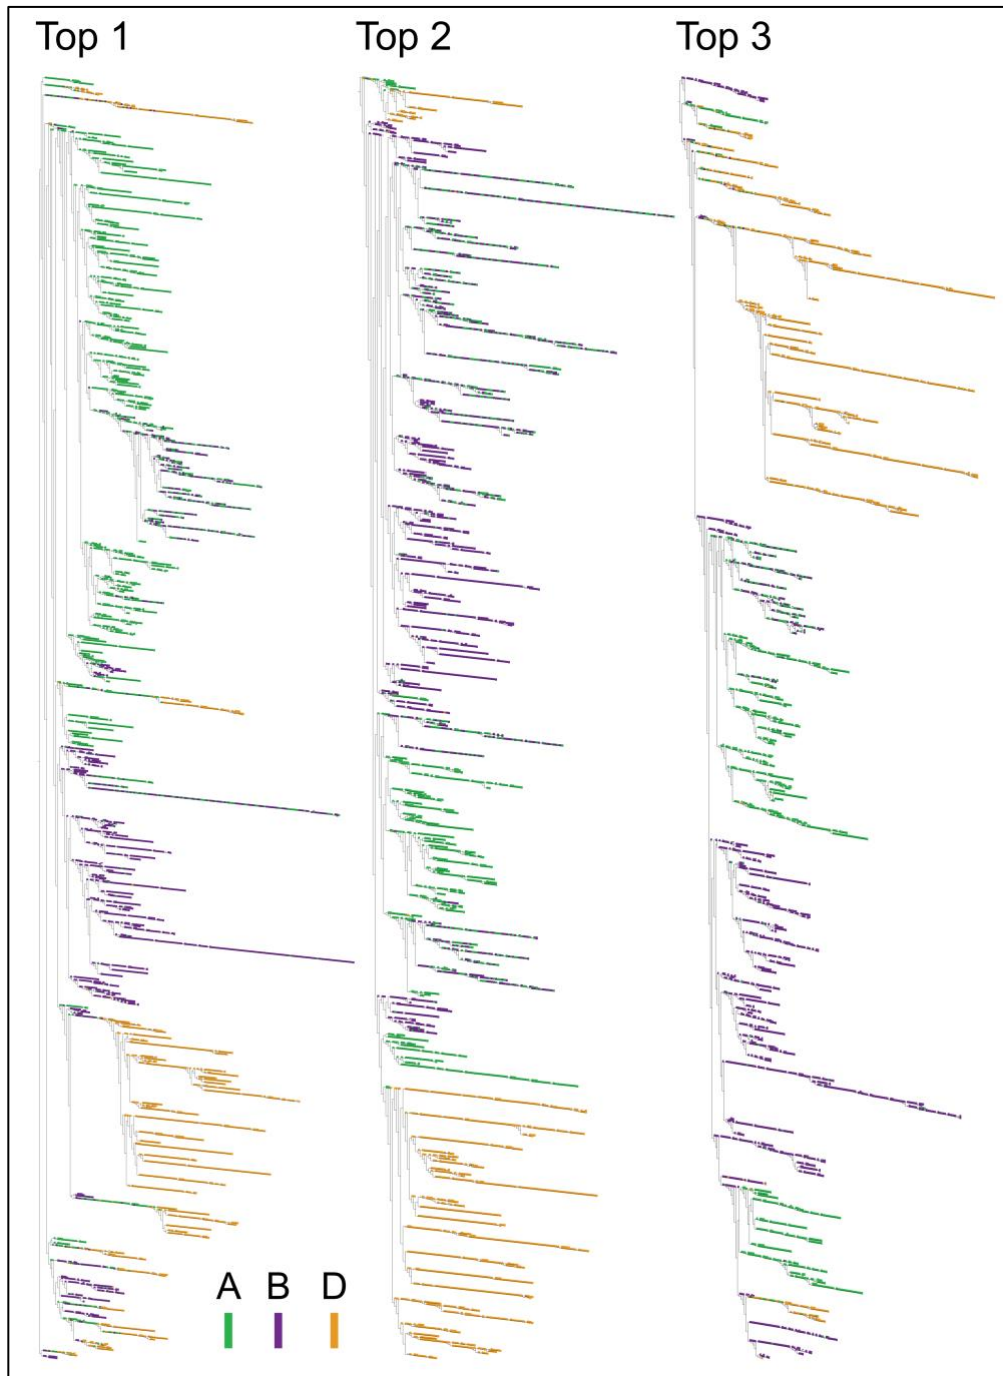

**Figure S18: Tree topologies of the top3 90/90 clusters.** The trees are depicted with identical branch lengths to get a better impression of their topologies.

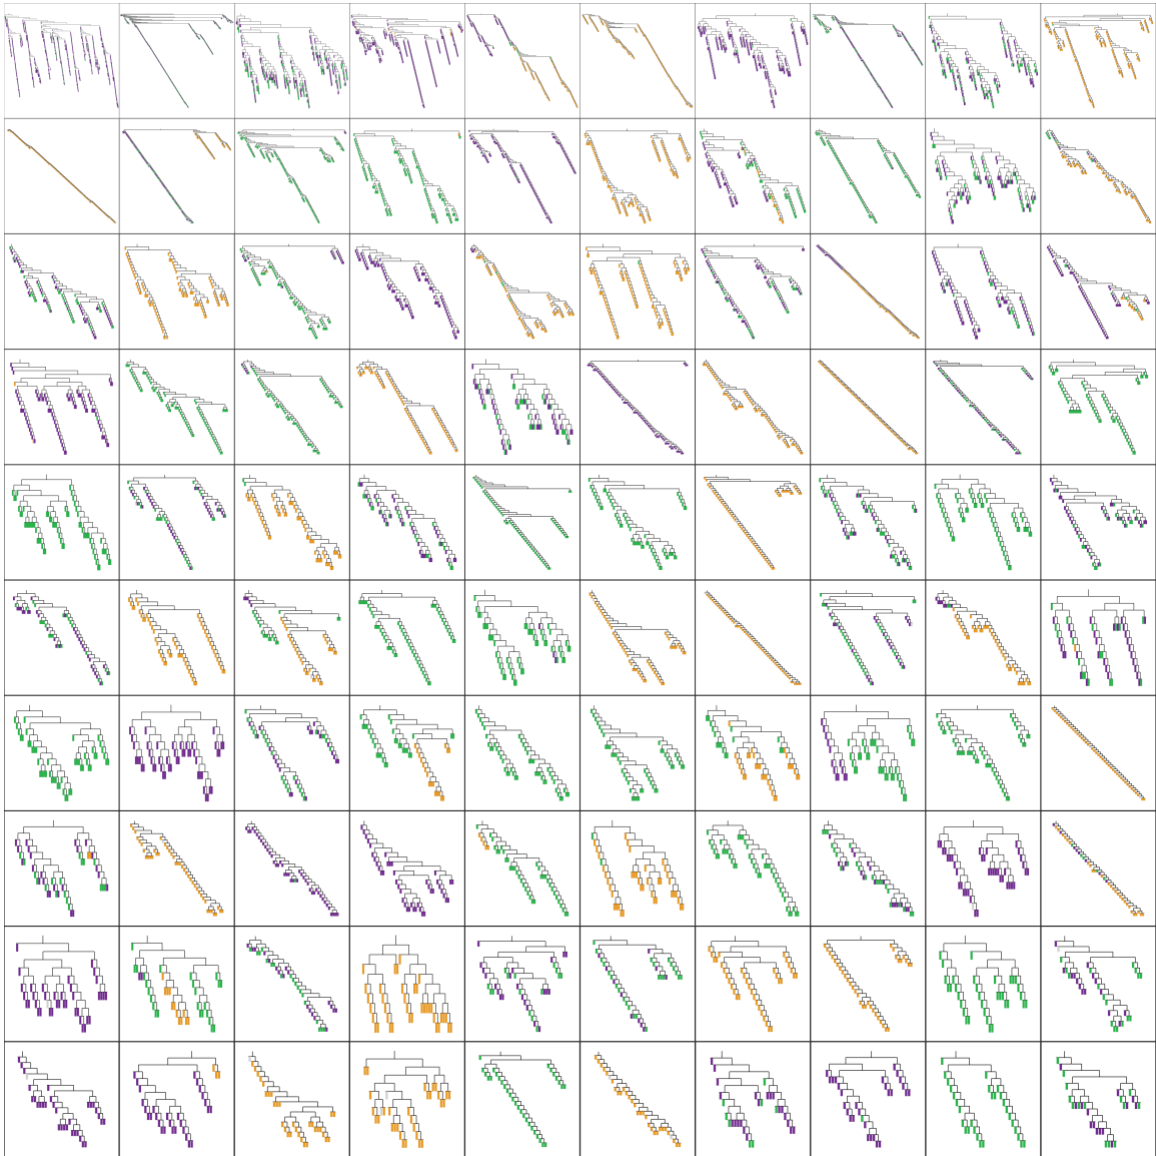

**Figure S19: Tree topologies of the top4 to top103 90/90 clusters.** Subgenome colors: A-green, B-magenta, D-orange.

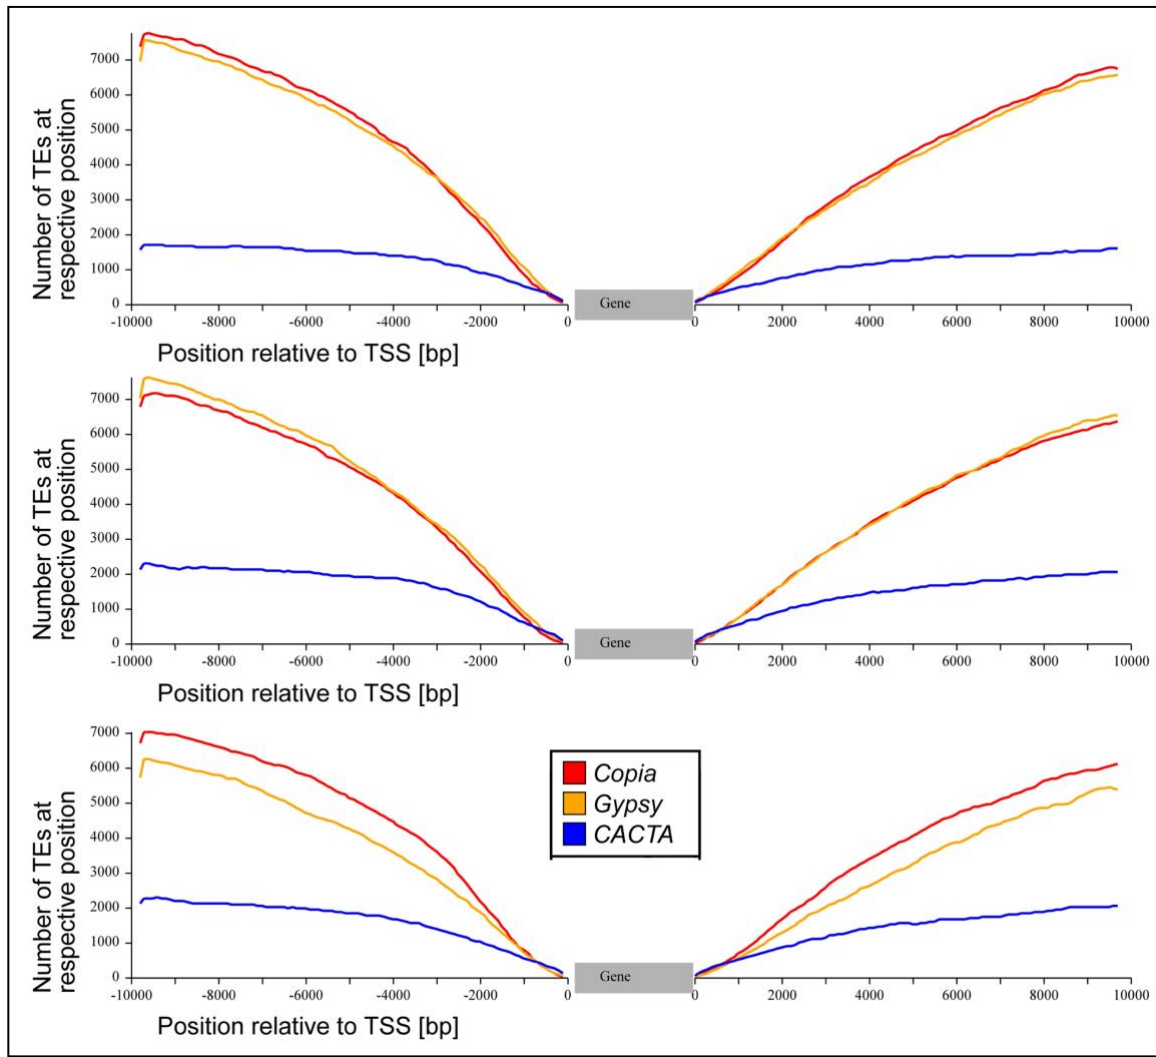

**Figure S20: TE landscape surrounding genes.** Genes from the three subgenomes were treated separately. For all genes, the 10 kb upstream of the transcription start site (TSS) and 10 kb downstream of the transcription end site were analyzed. Abundance of the different TE families was compiled for all genes of each subgenome. The plots include only those superfamilies that are highly abundant in intergenic regions. Note that the scale of the y-axis differs from that on Figure 7.
